# Supplementary material
Source: PubMed Central journal article supplement (PMC2674434)

SUPP FIGURE 1

a

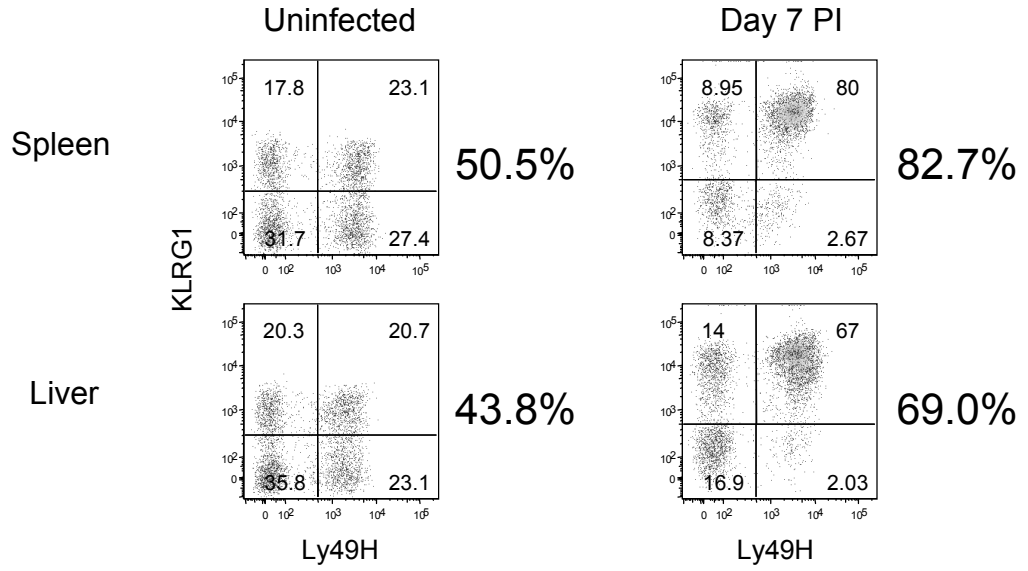

b

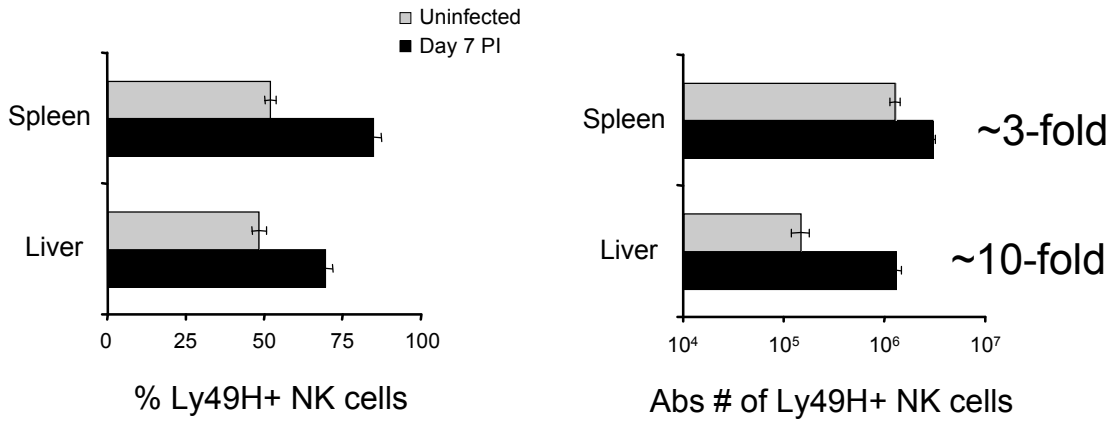

SUPP FIGURE 2

**a**

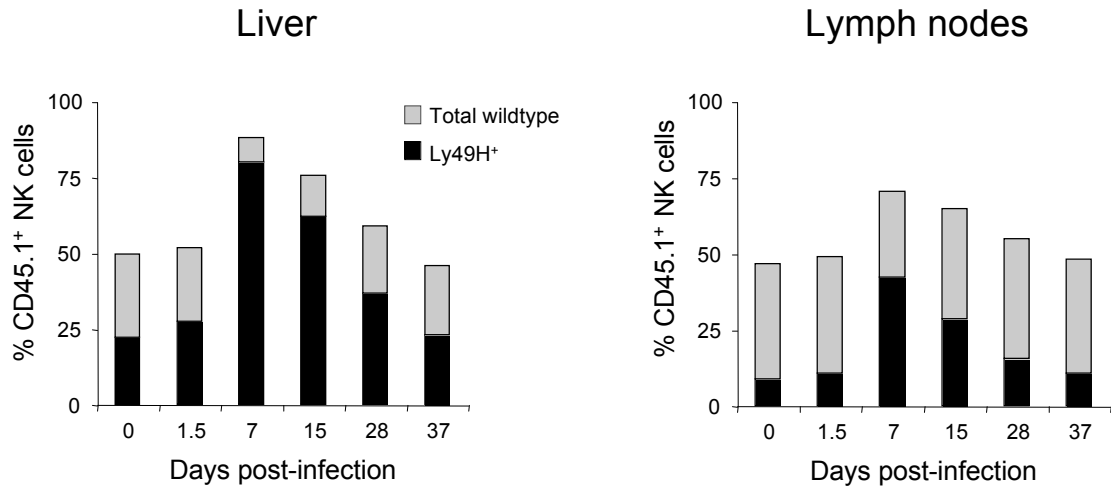

**b**

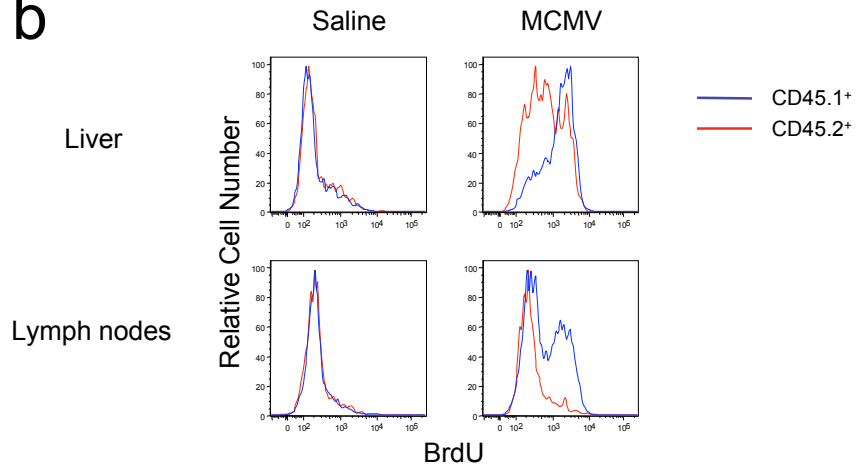

**c**

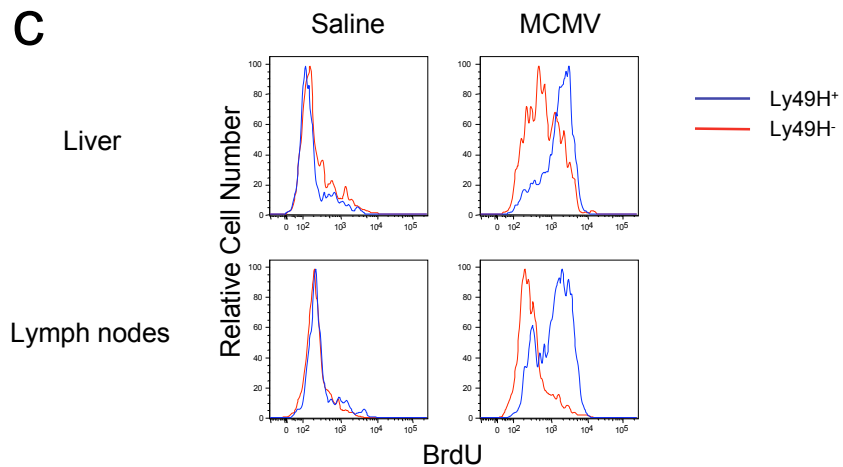

SUPP FIGURE 3

a

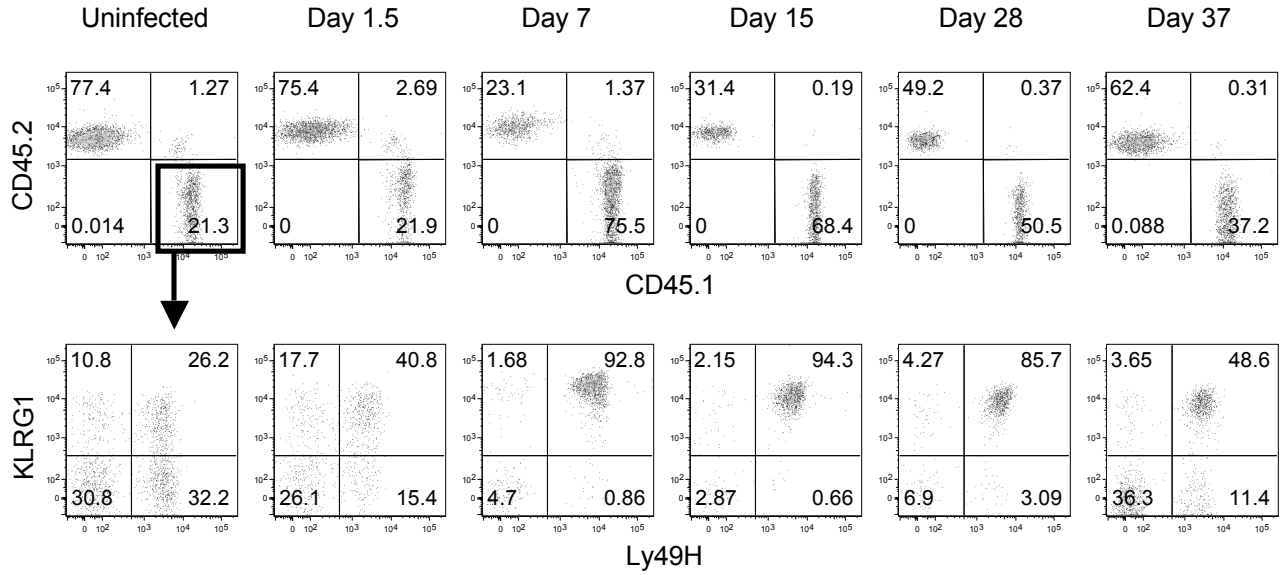

b

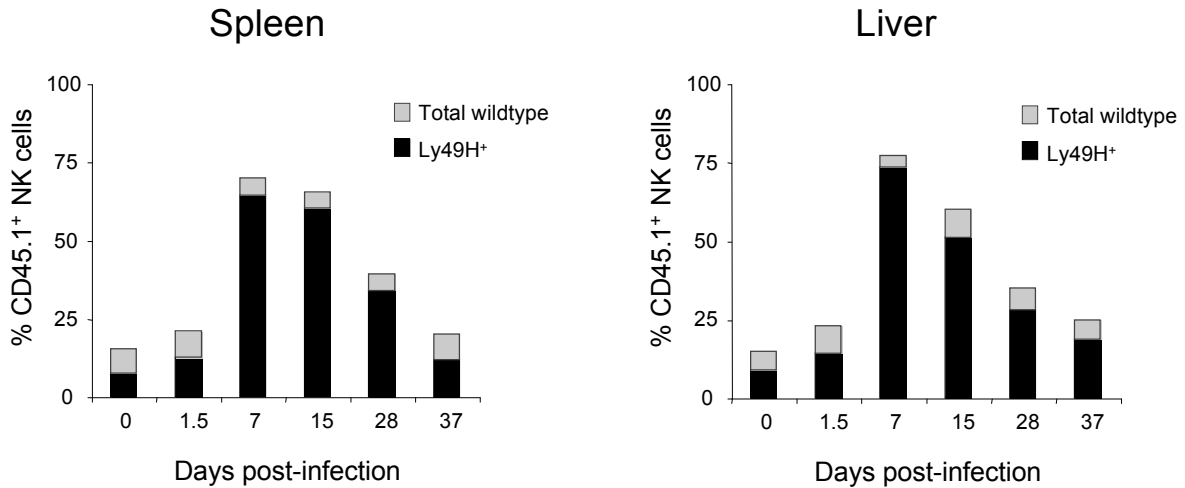

SUPP FIGURE 4

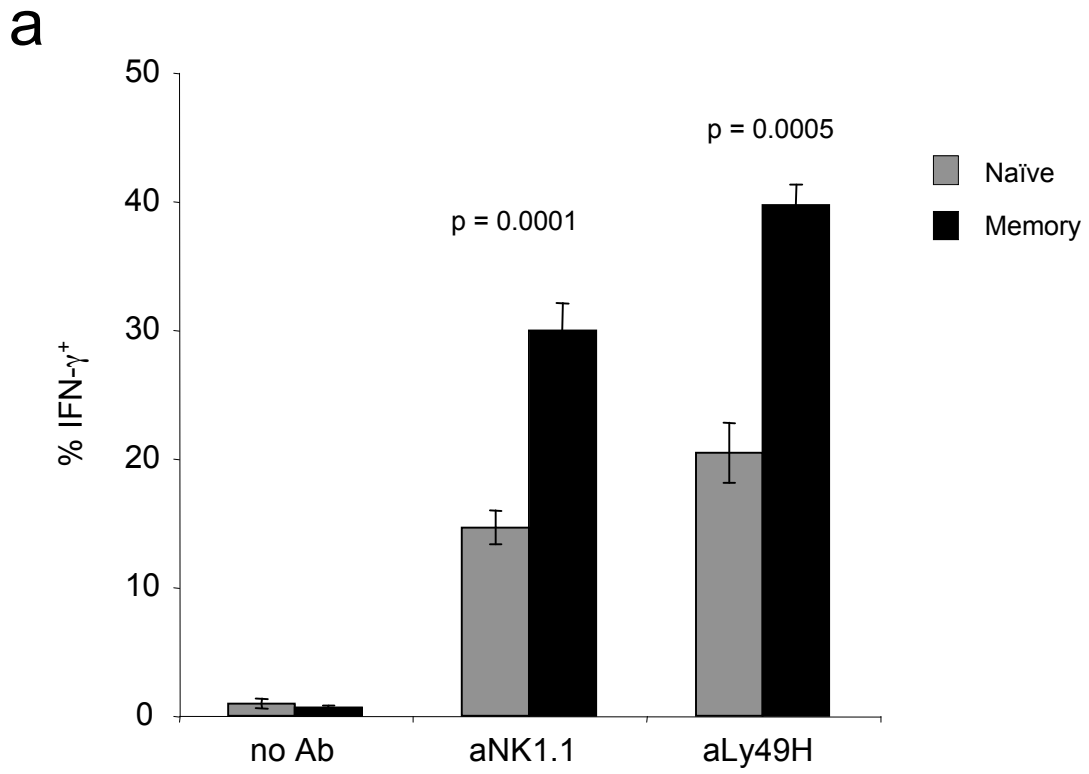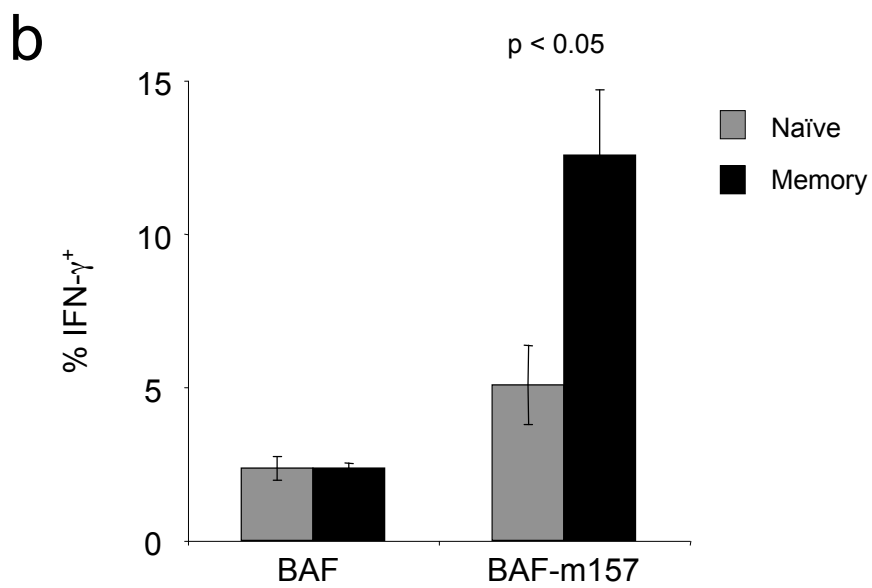

SUPP FIGURE 5

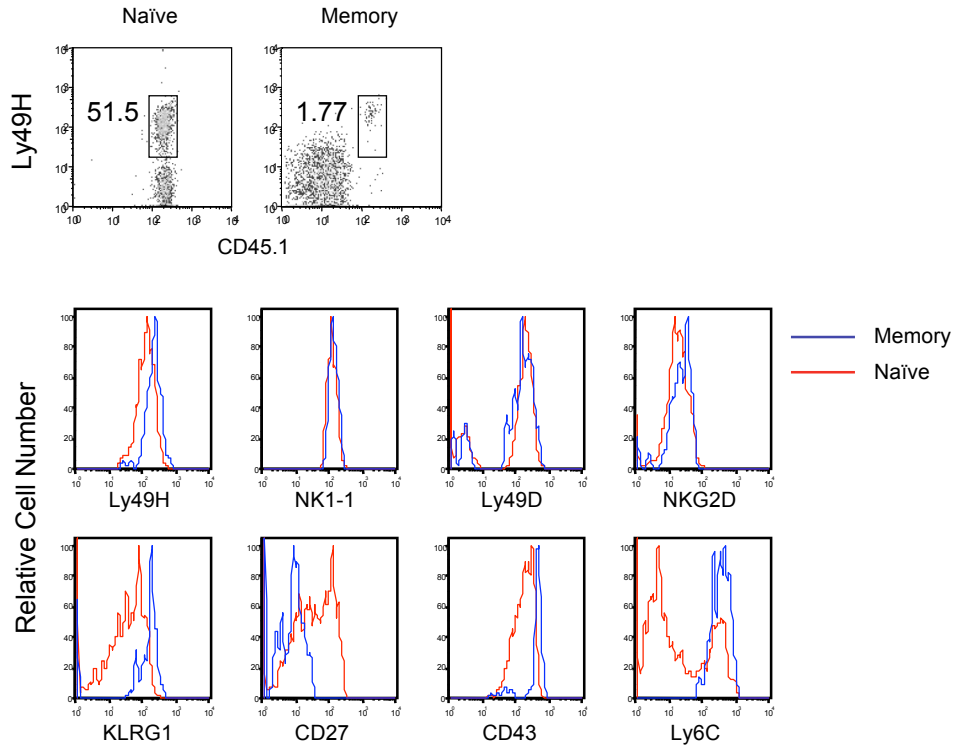

Supplement: NIHMS102772-supplement-2.pdf [file NIHMS102772-supplement-2.pdf]
